# Supplementary material for: Hedgehog/GLI1 signaling pathway regulates the resistance to cisplatin in human osteosarcoma
Source: PubMed Central journal article supplement (PMC8518013; doi:10.7150/jca.61591), 2021-09-21
Supplement: jcav12p6676s1.pdf [file jcav12p6676s1.pdf]

**Supplementary Table 1. Clinical information of samples from patients with osteosarcoma**

| Number(n=8) | Age<br>(year) | Gender | Tumor type                                         | Clinical<br>stages |
|-------------|---------------|--------|----------------------------------------------------|--------------------|
| 1           | 84            | female | Osteoblastic osteosarcoma                          | -                  |
| 2           | 9             | female | Common osteosarcoma                                | IIB                |
| 3           | 17            | male   | Common osteosarcoma                                | -                  |
| 4           | 20            | male   | Fibroblastic osteosarcoma                          | IIB                |
| 5           | 13            | male   | osteosarcoma (with necrosis after<br>chemotherapy) | III                |
| 6           | 17            | male   | Common osteosarcoma                                | IIB                |
| 7           | 18            | male   | Common osteosarcoma                                | IIB                |
| 8           | 15            | male   | Multiple/metastatic osteosarcoma                   | -                  |
